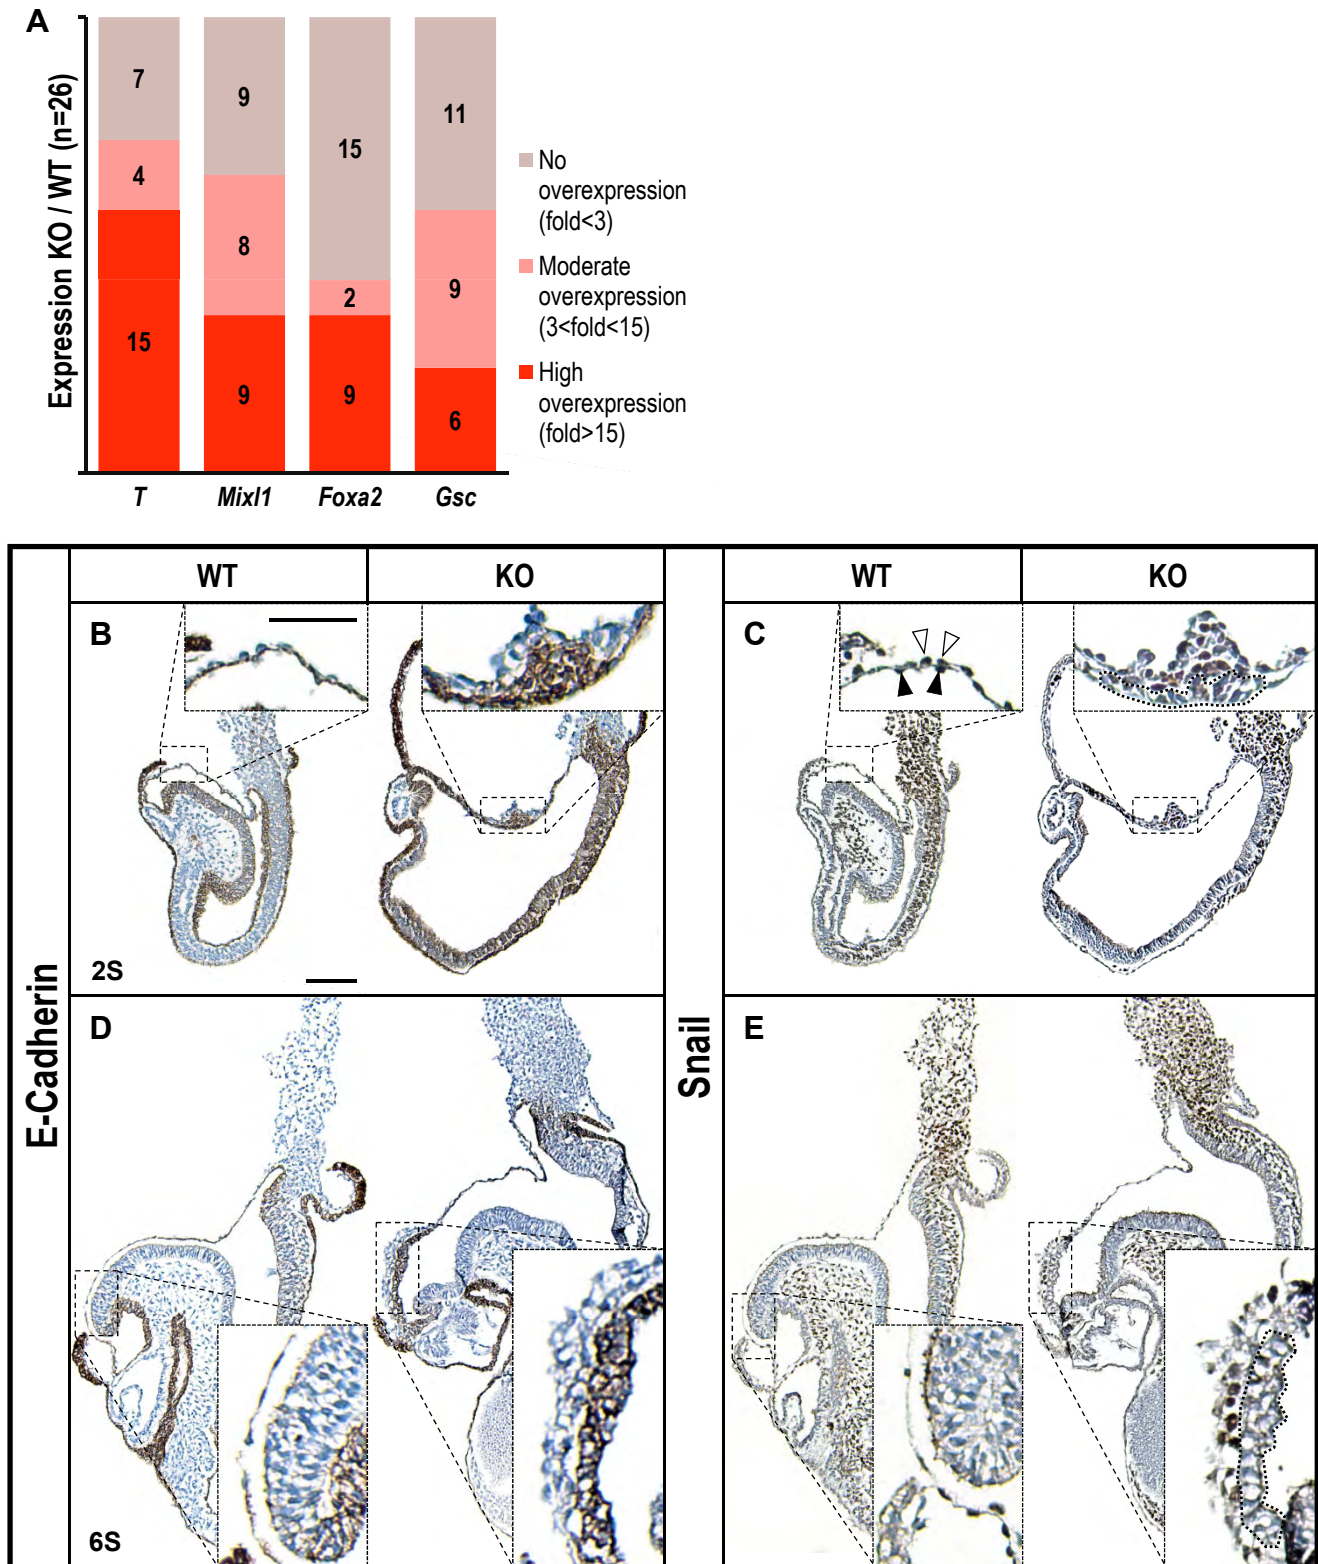

**Fig. S1. Ectopic expression of mesoderm markers in the *Smad5* mutant amnion.** (A) Bar graph summarizing the expression of *T*, *Mixl1*, *Gsc* and *Foxa2* by quantitative RT-PCR in *Smad5* knockout compared with control littermate amnions at E7.5 ( $n=26$  amnion pairs), well before the morphological appearance of the cell clump. (B-E) E-cadherin and Snail localization in wild-type and *Smad5* knockout embryos at the 2S and 6S stage, respectively. Insets are magnifications of the boxed areas. In wild-type embryos, Snail is present both in the amniotic mesoderm (open arrowheads) and in the amniotic ectoderm (arrowheads). In the clump in *Smad5* KO amnion, Snail is absent from most cells located in the outlined region. Scale bars: 100  $\mu$ m on figure panels; 25  $\mu$ m in the inserts.

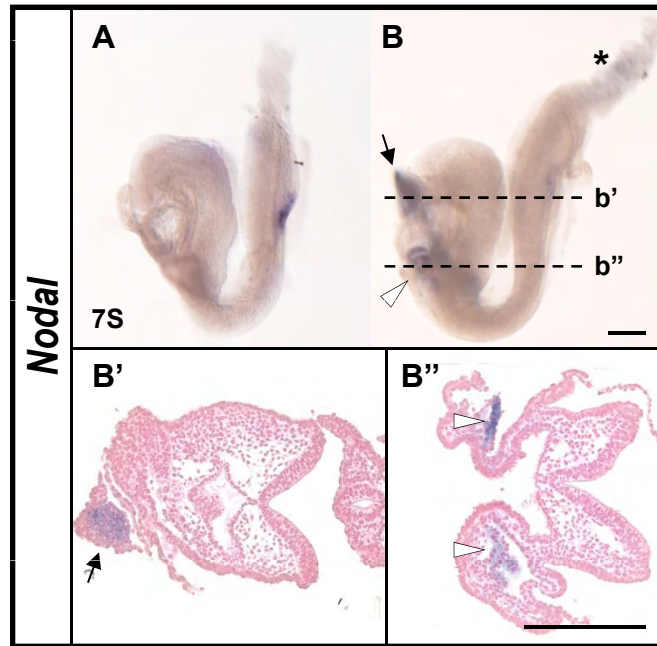

**Fig. S2. Ectopic *nodal* expression in the *Smad5* mutant at E8.5.** (A,B) *Nodal* expression in (A) wild-type and (B) *Smad5* KO embryos at 7S stage. Ectopic *Nodal* is expressed in amnion (arrow), cardiac crescent (open arrow head) and distal tip of the allantois (asterisk). (B',B'') Transverse sections of the *Smad5* KO embryo shown in B at the indicated levels. Scale bars: 200  $\mu$ m.

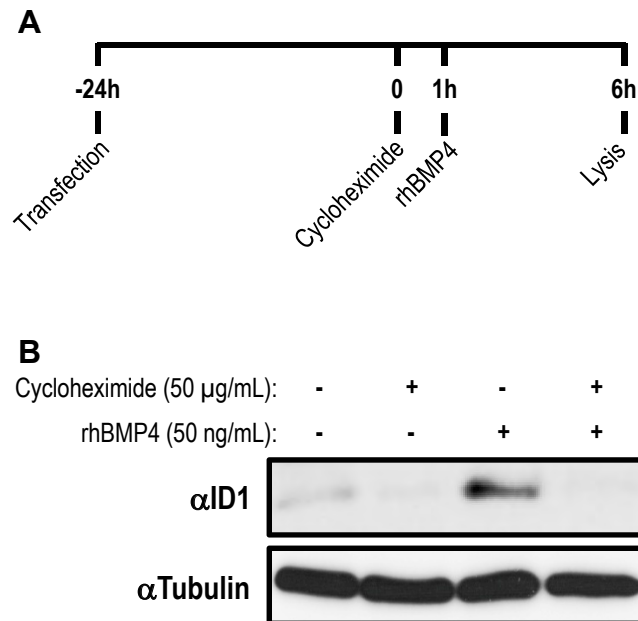

**Fig. 3. Validation of protein synthesis blockade by cycloheximide.** (A) Experimental setup using cycloheximide. Treatment of HEK293T cells with cycloheximide was for 1 hour before and during the 5-hour stimulation with rhBMP4. (B) Treatment with cycloheximide as depicted in A blocks effectively protein synthesis, as shown by western blot analysis of the BMP target gene ID1. Tubulin was used as a loading control.

| Target Gene            | Primer sequence                            |
|------------------------|--------------------------------------------|
| <i>β-galactosidase</i> | TTGTTCCACGGAGAATCCG                        |
|                        | CACCACAGATGAAACGCCGA                       |
| <i>Bmp4</i>            | GATCACCTCAACTCAACCAA                       |
|                        | TTTCAACACCACCTTGTCAT                       |
| <i>Foxa2</i>           | AGTCACGAACAAAGCGGG                         |
|                        | TTCCTCAAAGCTCTCCCAAAG                      |
| <i>Gapdh</i>           | AAGAAGGTGGTGAAGCAGGC                       |
|                        | GCCTCTCTTGCTCAGTGTCC                       |
| <i>Gsc</i>             | AGTCAGAAAACGCCGAGAAG                       |
|                        | TGCAAGTAGCATCGACTGTC                       |
| <i>Lefty2</i>          | TCCTTGCCCATGATTGTCAG                       |
|                        | CTGACGAGAGCACTAAGTTAGG                     |
| <i>luciferase</i>      | ACATTTTCGCAGCCTACCGTAGTGT                  |
|                        | GGTAATCCGTTTTAGAATCC                       |
| <i>Mixl1</i>           | TGGCTCAAAGTTGGACTCC                        |
|                        | CAGTAAAGGCTCAGTGTGAGAG                     |
| <i>Nodal</i>           | AAAAGTGTTGGCATCAGCCC                       |
|                        | TGGTGCTGGCGACAGGTAC                        |
| <i>T</i>               | AACAGCTCTCCAACCTATGC                       |
|                        | TACCATTGCTCACAGACCAG                       |
| <i>Ubc</i>             | TAAAAAGAGCCCTCCTTGTGCT                     |
|                        | AGACACCTCCCCATCACAC                        |
| <i>Wnt3</i>            | AGCTGCCAAGAGTGTATTG                        |
|                        | CTAGATCCTGCTTCTCATGGG                      |
| Universal primer 1     | ATATGGATCCGGCGCGCCGTCGACTTTTTTTTTTTTTTTTTT |
| Universal primer 2     | ATATCTCGAGGGCGCGCCGGATCCTTTTTTTTTTTTTTTTTT |

**Table S1. Validated primers used for quantitative RT-PCR.** The primer sequences of the respective genes and poly-dT universal primers appear with the forward primer followed by the reverse primer.
